# Supplementary material
Source: PubMed Central journal article supplement (PMC3913739)
Supplement: NIHMS515289-supplement-Supp_Info.pdf [file NIHMS515289-supplement-Supp_Info.pdf]

### **Taqman Probe Sequences (Applied Biosystems):**

1. **COX-2 (Ptgs2)** - probe ID: **Mm00478374\_m1**; NCBI Reference Sequence: NM\_011198.3; Amplicon length: 80.
2. **CCL2** - probe ID: **Mm00441242\_m1**; NCBI Reference Sequence: NM\_011333; Amplicon length: 74.
3. **CTSK** – probe ID: **Mm00484039\_m1**; NCBI Reference Sequence: NM\_007802; Amplicon length: 73.
4. **CTSS** – probe ID: **Mm01255859\_m1**; NCBI Reference Sequence: NM\_021281; Amplicon length: 75.
5. **CTSB** – probe ID: **Mm01310506\_m1**; NCBI Reference Sequence: NM\_007798; Amplicon length: 94.
6. **TRAcP (Acp5)** – probe ID: **Mm00475698\_m1**; NCBI Reference Sequences: NM\_001102404, NM\_001102405, NM\_007388; Amplicon length: 79.
7. **F4/80 (Emr1)** – probe ID: **Mm00802529\_m1**; NCBI Reference Sequence: NM\_010130; Amplicon length: 92.
8. **HPRT1** – probe ID: **Mm01545399\_m1**; NCBI Reference Sequence: NM\_013556; Amplicon length: 81.
9. **GUSB** – probe ID: **Mm00446956\_m1**; NCBI Reference Sequence: NM\_010368; Amplicon length: 88.
