# Supplementary material
Source: PubMed Central journal article supplement (PMC3913739)
Supplement: NIHMS515289-supplement-Table_S1.pdf [file NIHMS515289-supplement-Table_S1.pdf]

**SUPPLEMENTARY TABLE 1: CCL2 ELISA assay results for cell culture supernatants from BMMs interacting with prostate carcinoma cells.** Samples were normalized to DNA concentration in corresponding cell lysates.

|                            | <b>CCL2 (pg/ml)</b> | <b>S.D.</b> |
|----------------------------|---------------------|-------------|
| <b>PC3 TRANSWELL</b>       |                     |             |
| WT BMM Alone               | 36.43               | 32.11       |
| WT BMM/PC3 Transwell       | <b>302.43</b>       | 57.23       |
| CTSK KO BMM Alone          | 42.70               | 17.43       |
| CTSK KO BMM /PC3 Transwell | <b>123.10</b>       | 29.15       |
| <b>ARCAP(M) TRANSWELL</b>  |                     |             |
| WT BMM Alone               | 53.01               | 17.2        |
| WT BMM/ARCaP(M) Transwell  | <b>198.14</b>       | 27.54       |
| CTSK KO BMM Alone          | 61.61               | 23.59       |
| CTSK KO BMM /PC3 Transwell | <b>140.59</b>       | 32.8        |
| <b>RM1 TRANSWELL</b>       |                     |             |
| WT BMM Alone               | 33.53               | 15.17       |
| RM1 cells                  | 120.11              | 23.19       |
| WT BMM/RM1 Transwell       | <b>378.22*</b>      | 71.20       |
| CTSK KO BMM Alone          | 29.79               | 14.35       |
| CTSK KO/RM1 Transwell      | <b>247.37**</b>     | 57.38       |

\* Final result corrected for contribution of murine RM1 cells (original value for WT/RM1 Transwell: 498.33 pg/ml)

\*\* Final result corrected for contribution of murine RM1 cells (original value for KO/RM1 Transwell: 367.26 pg/ml)
